# Supplementary material for: Homologous Recombination within Large Chromosomal Regions Facilitates Acquisition of β-Lactam and Vancomycin Resistance in Enterococcus faecium
Source: PubMed Central journal article supplement (PMC5038250; doi:10.1128/aac.00488-16), 2016-09-23
Supplement: AAC.00488-16_zac010165544so1.pdf [file AAC.00488-16_zac010165544so1.pdf]

## Supplemental table 1

pLRM23 and pRIH77 transfer and persistence in the studied transconjugants

| TC   | pLRM23 DNA identified* | <i>hyl+</i> in assembly | <i>hyl+</i> by PCR | pRIH77 DNA identified | <i>bact+</i> by PCR |
|------|------------------------|-------------------------|--------------------|-----------------------|---------------------|
| C68  | 227                    | ✓                       | ✓                  | ✓                     | ✓                   |
| TC-A | 227                    | ✓                       | ✓                  | ✓                     | ✓                   |
| TC-B | 227                    | ✓                       | ✓                  | ✓                     | ✓                   |
| TC-C | NI                     | ✗                       | ✓**                | ✓                     | ✗                   |
| TC-D | NI                     | ✗                       | ✗                  | ✓                     | ✓                   |
| TC-E | NI                     | ✗                       | ✓**                | ✓                     | ✓                   |
| TC-F | NI                     | ✗                       | ✓**                | ✗                     | ✓**                 |
| TC-G | 185                    | ✓                       | ✓                  | ✓                     | ✓                   |
| TC-H | 166                    | ✓                       | ✓                  | ✓                     | ✓                   |
| TC-I | NI                     | ✗                       | ✓**                | ✓                     | ✓                   |
| TC-J | NI                     | ✗                       | ✗                  | ✗                     | ✓**                 |
| TC-K | NI                     | ✗                       | ✗                  | ✗                     | ✓**                 |
| TC-L | NI                     | ✗                       | ✗                  | ✗                     | ✗                   |
| TC-M | NI                     | ✗                       | ✗                  | ✗                     | ✗                   |
| TC-N | NI                     | ✗                       | ✗                  | ✗                     | ✗                   |

\* DNA in KB

\*\*Weak expression

NI: no putative plasmid sequences identified

## Supplemental table 2

### Whole Genome Assembly Summary

#### Illumina sequencing data

| Genome  | Total Reads <sup>1</sup> | Matched Reads | N50   | Contigs | Average Coverage <sup>2</sup> |
|---------|--------------------------|---------------|-------|---------|-------------------------------|
| C68     | 2126619                  | 1897736       | 47395 | 183     | 66                            |
| D344RRF | 2203139                  | 1924712       | 35830 | 207     | 53                            |
| TC-A    | 2527467                  | 2284692       | 40456 | 247     | 71                            |
| TC-B    | 2671250                  | 2410547       | 41990 | 263     | 70                            |
| TC-C    | 3537359                  | 3212988       | 35869 | 214     | 121                           |
| TC-D    | 3751597                  | 3458322       | 35834 | 212     | 127                           |
| TC-E    | 1542233                  | 1428942       | 35791 | 217     | 54                            |
| TC-F    | 3299710                  | 3045678       | 40461 | 212     | 116                           |
| TC-G    | 3520668                  | 3190520       | 39644 | 250     | 117                           |
| TC-H    | 4808630                  | 4447044       | 32295 | 272     | 153                           |
| TC-I    | 1573878                  | 978814        | 38454 | 211     | 57                            |
| TC-J    | 1591722                  | 1108042       | 35830 | 207     | 63                            |
| TC-K    | 1551997                  | 1186554       | 35840 | 206     | 69                            |
| TC-L    | 1635590                  | 1161898       | 35792 | 221     | 67                            |
| TC-M    | 2890937                  | 2128221       | 35949 | 338     | 113                           |
| TC-N    | 3013882                  | 2192401       | 42109 | 204     | 125                           |

<sup>1</sup>Total Reads and corresponding N50 values represent the results from *de novo* assembly (see Materials and Methods for assembly parameters)

<sup>2</sup>Average Genome Coverage is based on mapping coverage to the *Enterococcus faecium* strain DO chromosome (GenBank: NC\_017960) for reference purposes and does not take into account mapping and coverage to plasmids associated with the *E. faecium* strain DO genome

### Supplemental table 3

SVP comparison transconjugants vs. parents

| Transconjugant | D344RRF | C68   |
|----------------|---------|-------|
| C68            | 11954   | 23*   |
| D344RRF        | 34*     | 11024 |
| TC-A           | 293     | 10614 |
| TC-B           | 55      | 10778 |
| TC-C           | 64      | 10982 |
| TC-D           | 37      | 10619 |
| TC-E           | 47      | 9997  |
| TC-F           | 70      | 10900 |
| TC-G           | 89      | 10553 |
| TC-H           | 44      | 9837  |
| TC-I           | 293     | 10523 |
| TC-J           | 132     | 10981 |
| TC-K           | 501     | 10792 |
| TC-L           | 61      | 11284 |
| TC-M           | 69      | 11148 |
| TC-N           | 43      | 10953 |

Minimum coverage: 30X

Minimum Variant Frequency: 95%

Maximum P-value: 10e-7

\*Note: SVP identified between the raw reads and the assembled genome of the same strain were concentrated in regions with coverage close to the minimum, mostly at the ends of contigs or in regions comprising insertion sequences and other transposable elements.

## Supplemental table 4

Primers used in this work to verify Cross-Over Regions, to detect putative pLRM23 plasmid genes and to perform RT-qPCR.

| NAME           | SEQUENCE                                           | AMPLICON<br>in bp | AMPLIFIES                        |
|----------------|----------------------------------------------------|-------------------|----------------------------------|
| 19C-C68-F      | TATACATTATTAGATATTTACACCCATTAC<br>GTGAAAGAACTAAGAG | 400               | D344R C68 TC-D                   |
| 19C-C68-R      | GGAACGGAAATGATTAATGCAGC                            |                   |                                  |
| 19C-C68-F2     | TATACTTGTATTTTTTGAATCTGCTGAT<br>TTATTTCCCT         | 400               | D344R C68 TC-D                   |
| 19C-C68-R2     | TACGTCGACAAAATCAAAGCCATTTCCCT                      |                   |                                  |
| 19D/26USleftF  | AGTCCAAGTGAATTTACTGAT                              | 396               | D344R C68 TC-E TC-N              |
| 19D/26USleftR  | GCGTTTTATTGCCAGTCTGA                               |                   |                                  |
| 19D/26USrightF | GGGGATCATCGCAAACATCA                               | 238               | D344R C68 TC-E TC-N              |
| 19D/26USrightR | AAAAGAACCGCAGCGAGTG                                |                   |                                  |
| 19DDSleftF     | AGCGACTCCTAATATGAAGAGGG                            | 281               | D344R C68 TC-E                   |
| 19DDSleftR     | AGTGTCTGAATTTATCTTAAGCGA                           |                   |                                  |
| 19DDSRightF    | ACGGGAAAGCAGAGATACGA                               | 219               | D344R C68 TC-E                   |
| 19DDSRightR    | GCCGCTAATCCGCCTAAGAT                               |                   |                                  |
| 19FUSleftF     | CGTTGAAGATAGTCTGCGTGT                              | 240               | D344R C68 TC-F                   |
| 19FUSleftR     | GCTCAACTCGTCTGCCATTT                               |                   |                                  |
| 19FUSrightF    | GATACAGGCCGAAGAGTTGC                               | 390               | D344R C68 TC-F                   |
| 19FUSrightR    | TGCTTGTGTGTTTCTGGTTG                               |                   |                                  |
| 19FDSF         | AGTTGGACTTTGCGAGGAAG                               | 2355              | D344R C68 TC-F                   |
| 19FDSR         | ATGGATAAGCATGGCCACCT                               |                   |                                  |
| 20BUSleftF     | CCCGTTCAGACATCAAAGCC                               | 858               | D344R C68 TC-G                   |
| 20BUSleftR     | CAATTATTTAGTTGGGTTAGTGTTCG                         |                   |                                  |
| 20BUSrightF    | AACATGAACGTGCAGGGAAG                               | 745               | D344R C68 TC-G                   |
| 20BUSrightR    | ACATTCGGTCTCTTACAAACGT                             |                   |                                  |
| 20CUSF         | GGTATCGCTGACAGTGGAGT                               | 802               | D344R C68 TC-H*                  |
| 20CUR          | ATCTGCTTGTCCGATGATCT                               |                   |                                  |
| 20CDSF         | CGGTATTTGACGATCCCTGAG                              | 788               | D344R C68 TC-H*                  |
| 20CDR          | TGAAGAGAATATCCGCAACTGA                             |                   |                                  |
| 21USrightF     | TCACCACTTATTTGCTCTTATTGC                           | 100               | D344R C68 TC-C TC-I<br>TC-J TC-L |
| 21USrightR     | ATACGGCGCATTGATCAACG                               |                   |                                  |
| 23USleftF      | GTTGCAGACATCAAAAACAAGA                             | 684               | D344R C68 TC-K                   |
| 23USleftR      | AGCTTGATGTGTTGTGCTCT                               |                   |                                  |
| 23USrightF     | GCTCCTTGGAATGGCAAACA                               | 620               | D344R C68 TC-K                   |
| 23USrightR     | TCGTGAAGGATCGTTGGTGT                               |                   |                                  |
| 22/23DSleftF   | AGTAGTAATCGTCGGTACAGGT                             | 1755              | D344R C68 TC-J TC-K              |
| 22/23DSleftR   | CGAACTGCTCTTGTGCCAT                                |                   |                                  |
| 24DSF          | GTCATTCGGACCAGTCATTG                               | 1680              | D344R C68 TC-L                   |
| 24DSR          | CCTGCTACACCTTGATGGC                                |                   |                                  |
| 25DSleftF      | AGAAACGAACACTTCATTGGAA                             | 241               | D344R C68 TC-M                   |
| 25DSleftR      | ATCCGCTAATTCTGCTCCG                                |                   |                                  |
| 25DSrightF     | TGCAATCCTCACTCAATCCTC                              | 386               | D344R C68 TC-M                   |
| 25DSrightR     | TCATAACGATAAGCATCTTGGAAAGT                         |                   |                                  |
| 26DSF          | GCGGATCTAGGCGAATTGTC                               | 560               | D344R C68 TC-N                   |
| 26DSR          | ATCGTCCATGGAAACGCAAC                               |                   |                                  |
| 25DSCORleftF   | TGAAGGAGGTTCCGAGTATGA                              | 313               | D344R C68 TC-M                   |
| 25DSCORleftR   | GCTAATTCTGCTTCCGCTGT                               |                   |                                  |

|                     |                                                              |      |                                                    |
|---------------------|--------------------------------------------------------------|------|----------------------------------------------------|
| 25DSCORrightF       | GCGTGTAAGAAGAACGAGATGG                                       | 411  | D344R C68 TC-M                                     |
| 25DSCORrightR       | CTTCCTTGCGCAGCTAAGAT                                         |      |                                                    |
| DSCOP19C-F          | TCAACTTCTGAGGATCTTTTCCATT                                    | 2846 | D344R C68 TC-D                                     |
| DSCOP19C-R          | AAGCTCGATTTCAAACGGGATTG                                      |      |                                                    |
| USCOP19C-F          | GGGGATCTTATCAAGTAACGCGTGT                                    | 924  | D344R C68 TC-D                                     |
| USCOP19C-R          | ATTAGCAGTATGGTTCAGCATATATGCGG                                |      |                                                    |
| DSCOP20B-F2         | AACAGAAACAGCAGGACTAGTGCG                                     | 400  | D344R C68 TC-C TC-G                                |
| DSCOP20B-R2         | GAAAGTGGTTTTTTATTGAAAGAAGGAAA<br>TGATGCT                     |      |                                                    |
| DSCOP21-F           | TATTTGCCAATACAAAACAGCATGTG                                   | 395  | D344R C68 TC-I                                     |
| DSCOP21-R           | GTATGTTTTGACGATTTCCCGT                                       |      |                                                    |
| USCOP21-F2          | CTCGATAGATCTCGATCATTTTTTCTG                                  | 400  | D344R C68 TC-C TC-I<br>TC-J                        |
| USCOP21-R2          | TCCGATAATCTCTTGATTACTTGTATCGAT<br>AGA                        |      |                                                    |
| DSCOP23-F           | CGAATTA AAAACTTTATTTCTCAATTAGA<br>TCAGCATG                   | 2700 | D344R C68 TC-J TC-K                                |
| DSCOP23-R           | ACACCGTCGATATGCGGAAGTT                                       |      |                                                    |
| USCOP23-F           | GCCAAACCAAAGCAGTCCCTGT                                       | 1060 | D344R C68 TC-K                                     |
| USCOP23-R           | GCTATCATTCCATCATTGATCGGT                                     |      |                                                    |
| TC8USF              | AAGACGTACAATGGACCGCT                                         | 792  | D344R C68 TC-A                                     |
| TC8USR              | CAACTTCGCCAGGCAATACA                                         |      |                                                    |
| TC8DSF              | GCGATAACCACGGCTTCTTC                                         | 679  | D344R C68 TC-A                                     |
| TC8DSR              | AGTTGAAACAGCAGCCGTTG                                         |      |                                                    |
| TC20/25USleftF      | TTCATGGTGCAACGATTCCA                                         | 625  | D344R C68 TC-B TC-M                                |
| TC20/25USleftR      | GCAGCATGACAGACGATACC                                         |      |                                                    |
| TC20/25USright<br>F | GCTCCTTGAATGGCAAACA                                          | 620  | D344R C68 TC-B TC-M                                |
| TC20/25USright<br>R | TCGTGAAGGATCGTTGGTGT                                         |      |                                                    |
| TC20DSleftF         | TCTTCTCGATTTGAAGCCGT                                         | 604  | D344R C68 TC-B                                     |
| TC20DSleftR         | CACAGGATGCGGTATTTCTTCA                                       |      |                                                    |
| TC20DSrightF        | TGGATATTGACACAAGCGGT                                         | 244  | D344R C68 TC-B                                     |
| TC20DSrightR        | CGATTTTAAAGTCCAATTGCCGT                                      |      |                                                    |
| hyl-F               | ACACACCGCATAGGA                                              | 1002 | Unspecific amplification in<br>D344RRF 1.5 kb band |
| hyl-R               | GCTAGCAATATCGA                                               |      |                                                    |
| Pbp5F               | TGCTGCTGATGTCAAAGGAC                                         | 984  |                                                    |
| Pbp5R               | GGAGCATAACCTGTCGCAAAAT                                       |      |                                                    |
| vanWF               | ATCGAAGCTGCCACAGAGAT                                         | 220  |                                                    |
| vanWR               | AGCGATTTTTCCCTATCGT                                          |      |                                                    |
| pbp5-qPCR F         | TTTCTCTACACCGTCTGCATC                                        |      |                                                    |
| pbp5-qPCR R         | CAGGTTTGGAGATGGCTTTTG                                        |      |                                                    |
| pbp5-qPCR probe     | 5'/5Cy5/TCGTGGGACAACAGGTGGGAAAT/<br>3IAbRQSp/-3'             |      |                                                    |
| vanB lig F          | ATGATTACAGTTCCCGCAGAC                                        |      |                                                    |
| vanB lig R          | TCCAAGCACCCGATATACTTTC                                       |      |                                                    |
| vanB lig probe      | 5'/56-<br>FAM/TTCCTGCAC/ZEN/CCGATTTTCGTTCCCT/3<br>IABkFQ/-3' |      |                                                    |
| 16S forward         | CAAGCGTTGTCCGGATTTATTG                                       |      |                                                    |
| 16S reverse         | GCACTCAAGTCTCCAGTTT                                          |      |                                                    |
| 16S probe           | 5'/HEX/GAGCGCAGGCGGTTTCTTAAGTCT/IAB<br>kFQ/-3'               |      |                                                    |

\* Did not amplified product in TC-H
